# Supplementary material for: Physical Activity and Sedentary Time in Korean Adults before and during the COVID-19 Pandemic Using Data from the Korea National Health and Nutritional Examination Survey
Source: MDPI journal article supplement (doi:10.3390/jpm12081217), 2022-07-26
Supplement: s1 [file s1]

Supplementary Materials

# Physical Activity and Sedentary Time in Korean Adults before and during the COVID-19 Pandemic Using Data from the Korea National Health and Nutritional Examination Survey

So Young Kim <sup>1</sup>, Dae Myoung Yoo <sup>2</sup>, Mi Jung Kwon <sup>3</sup>, Ji Hee Kim <sup>4</sup>, Joo-Hee Kim <sup>5</sup>, Woo Jin Bang <sup>6,\*</sup> and Hyo Geun Choi <sup>1,7,\*</sup>

<sup>1</sup> Bundang CHA Medical Center, Department of Otorhinolaryngology-Head and Neck Surgery, CHA University, Seongnam 13488, Korea; sossi81@hanmail.net

<sup>2</sup> Hallym Data Science Laboratory, Hallym University College of Medicine, Anyang 14066, Korea; ydm1285@naver.com

<sup>3</sup> Department of Pathology, Hallym Sacred Heart Hospital, Hallym University College of Medicine, Anyang 14068, Korea; mulank@hanmail.net

<sup>4</sup> Department of Neurosurgery, Hallym University College of Medicine, Anyang 14068, Korea; kimjihee.ns@gmail.com

<sup>5</sup> Department of Medicine, Division of Pulmonary, Allergy, and Critical Care Medicine, Hallym Sacred Heart Hospital, Hallym University College of Medicine, Anyang 14068, Korea; luxjhee@gmail.com

<sup>6</sup> Department of Urology, Hallym Sacred Heart Hospital, Hallym University College of Medicine, Anyang 14068, Korea

<sup>7</sup> Department of Otorhinolaryngology-Head and Neck Surgery, Hallym University College of Medicine, Anyang 14068, Korea

\* Correspondence: yybbang@gmail.com (W.J.B.); pupen@naver.com (H.G.C.)

**Table S1.** Odds ratios (95% confidence intervals) for  $\geq 300$  min/wk of physical activity at work in 2020 compared to 2019 with subgroup analyses according to age and sex.

| Characteristics                         | Odds Ratios for $\geq 300$ min/wk of PA at Work in 2020 Compared to 2019 |                   |                       |                   |
|-----------------------------------------|--------------------------------------------------------------------------|-------------------|-----------------------|-------------------|
|                                         | Crude                                                                    | <i>p</i> -Value * | Adjusted <sup>†</sup> | <i>p</i> -Value * |
| Total participants ( <i>n</i> = 11,112) | 1.19 (0.88–1.60)                                                         | 0.258             | 1.21 (0.90–1.64)      | 0.213             |
| Age                                     |                                                                          |                   |                       |                   |
| 19–39 years old ( <i>n</i> = 3093)      | 1.33 (0.89–1.98)                                                         | 0.166             | 1.40 (0.93–2.10)      | 0.106             |
| 40–59 years old ( <i>n</i> = 4103)      | 1.06 (0.69–1.64)                                                         | 0.778             | 1.10 (0.71–1.71)      | 0.674             |
| $\geq 60$ years old ( <i>n</i> = 3916)  | 0.96 (0.50–1.87)                                                         | 0.911             | 0.92 (0.47–1.80)      | 0.800             |
| Sex                                     |                                                                          |                   |                       |                   |
| Males ( <i>n</i> = 4985)                | 1.08 (0.78–1.50)                                                         | 0.629             | 1.08 (0.77–1.50)      | 0.659             |
| Females ( <i>n</i> = 6127)              | 1.48 (0.88–2.49)                                                         | 0.140             | 1.60 (0.95–2.71)      | 0.078             |

Abbreviations: BMI, body mass index; PA, physical activity. \* Logistic regression, Significance at  $p < 0.05$ . <sup>†</sup> Adjusted for age, sex, income, employment, educational status, house type, marriage status, BMI, smoking status, alcohol consumption, sleep duration, hypertension, dyslipidemia, stroke, ischemic heart disease, osteoarthritis, rheumatoid arthritis, diabetes mellitus, chronic kidney disease, and gout.

**Table S2.** Odds ratios (95% confidence intervals) for physical activity at leisure time in 2020 compared to 2019 with subgroup analyses according to age and sex.

| Characteristics                         | Odds Ratios for $\geq 300$ min/wk of PA at Leisure Time in 2020 Compared to 2019 |                   |                       |                   |
|-----------------------------------------|----------------------------------------------------------------------------------|-------------------|-----------------------|-------------------|
|                                         | Crude                                                                            | <i>p</i> -Value * | Adjusted <sup>†</sup> | <i>p</i> -Value * |
| Total participants ( <i>n</i> = 11,112) | 1.08 (0.87–1.33)                                                                 | 0.504             | 1.03 (0.83–1.27)      | 0.806             |
| Age                                     |                                                                                  |                   |                       |                   |
| 19–39 years old ( <i>n</i> = 3093)      | 0.99 (0.76–1.29)                                                                 | 0.943             | 0.96 (0.73–1.26)      | 0.756             |
| 40–59 years old ( <i>n</i> = 4103)      | 1.12 (0.83–1.52)                                                                 | 0.446             | 1.15 (0.85–1.57)      | 0.364             |
| $\geq 60$ years old ( <i>n</i> = 3916)  | 1.22 (0.83–1.80)                                                                 | 0.311             | 1.14 (0.77–1.69)      | 0.514             |
| Sex                                     |                                                                                  |                   |                       |                   |
| Males ( <i>n</i> = 4985)                | 0.99 (0.79–1.26)                                                                 | 0.963             | 0.97 (0.77–1.23)      | 0.804             |
| Females ( <i>n</i> = 6127)              | 1.24 (0.91–1.69)                                                                 | 0.167             | 1.16 (0.86–1.58)      | 0.337             |

Abbreviations: BMI, body mass index; PA, physical activity. \* Logistic regression, Significance at  $p < 0.05$ . <sup>†</sup> Adjusted for age, sex, income, employment, educational status, house type, marriage status, BMI, smoking status, alcohol consumption, sleep duration, hypertension, dyslipidemia, stroke, ischemic heart disease, osteoarthritis, rheumatoid arthritis, diabetes mellitus, chronic kidney disease, and gout.
